# Supplementary material
Source: Springer Nature journal article supplement (https://www.springermedizin.de/resource/supplementary/12245_2011_58_MOESM2_ESM.pdf/9672686)

Sensitivity

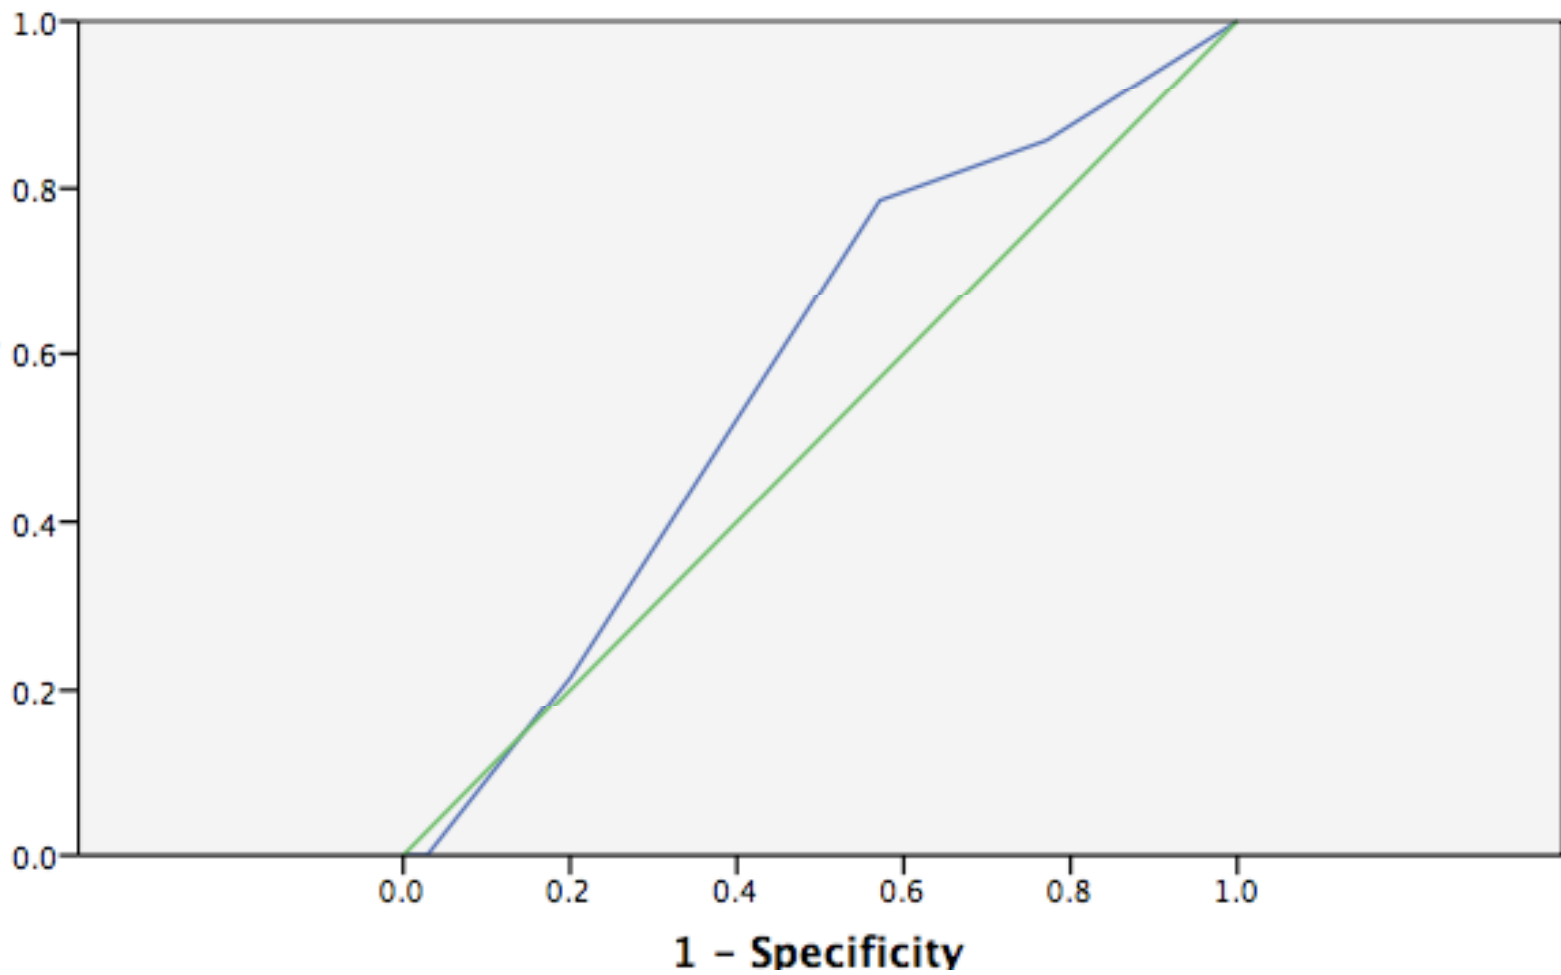

Supplement: MOESM2 [file 9672686]
